# Supplementary material for: Selectively controlled synthesis of diethyl carbonate and methyl ethyl carbonate via transesterification of dimethyl carbonate over a KATriz/Al2O3 catalyst
Source: Royal Society of Chemistry journal article supplement (doi:10.1039/d4cy00979g), 2024-01-01
Supplement: d4cy00979g1.pdf [file d4cy00979g1.pdf]

## Supplementary Information:

# Selectively controlled synthesis of diethyl carbonate and methyl ethyl carbonate via transesterification of dimethyl carbonate over KATriz/Al<sub>2</sub>O<sub>3</sub> catalyst

Peixue Wang, ‡<sup>a,b</sup> Shimin Liu, ‡<sup>a</sup> Xinjiang Cui,<sup>\*a,b</sup> Feng Shi<sup>\*a,b</sup>

### Catalyst characterization

The BET surface areas were conducted by using an American Quantachrome iQ2 automated gas sorption analyzer at 77 K. The pore-size distribution was calculated by Barrett, Joyner, and Halenda (BJH) method from desorption isotherm.

IR-diffuse reflectance spectra (IR) of samples were analyzed by a Bruker VERTEX 70 FTIR spectrometer. Thermogravimetry curves were scanned under N<sub>2</sub> atmosphere at a heating rate of 10 °C/min from 30 °C to 800 °C on METTLER TG1 system

X-ray diffraction (XRD) was examined on a Siemens D/max-RB powder X-ray diffract meter with Cu K $\alpha$  radiation (40 mA, 40 kV) and the patterns recorded in the 2 Theta range of 10° to 80°.

X-ray photoelectron spectroscopy (XPS) was performed on VG ESCALAB210 using Al K $\alpha$  radiation at a pass energy of 20 eV. The electron binding energy was referenced to the C1s peak at 284.8 eV.

The surface base properties of the catalysts were tested by CO<sub>2</sub>-TPD equipped with a thermal conductivity detector (TCD). The solid sample (100 mg) was pretreated at 200 °C for 1 h under He (40 mL/min) and then cooled to 30 °C. Then the sample was exposed to CO<sub>2</sub> stream (50 mL/min) 30 °C for 1 h and flushed again with He for 1 h to wipe off any physico-adsorbed CO<sub>2</sub>. The desorption profile was recorded at a heating rate of 10 °C min<sup>-1</sup> from 30 °C to 300 °C and maintained at this temperature until the TCD signal came back to baseline. The basic amounts were expressed as the number of CO<sub>2</sub> molecules per gram of catalyst ( $\mu\text{mol CO}_2/\text{g}$ ).

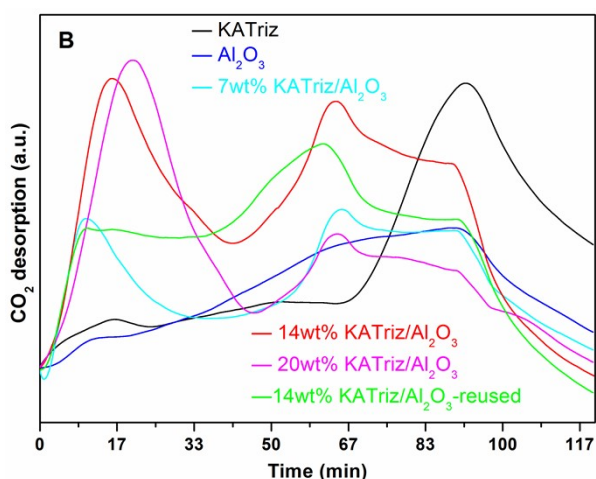

Fig.S1 CO<sub>2</sub>-TPD profiles of KATriz, Al<sub>2</sub>O<sub>3</sub>, and KATriz/Al<sub>2</sub>O<sub>3</sub> catalyst

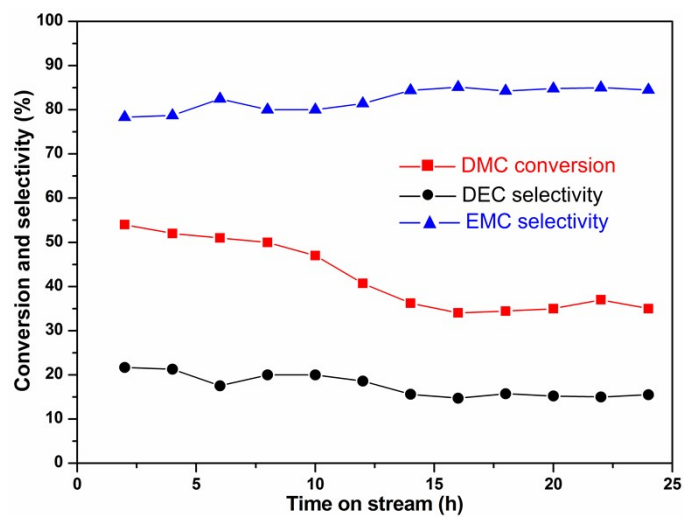

**Fig. S2** Stability of the 14wt%KATriz/ $\text{Al}_2\text{O}_3$  catalyst for the transesterification of DMC and  $\text{C}_2\text{H}_5\text{OH}$ . [Reaction conditions: 80 °C, DMC/ethanol =1:2 (molar ratio), and LHSV = 6  $\text{h}^{-1}$ ]
